# Supplementary material for: Magnetoliposomes Based on Magnetic/Plasmonic Nanoparticles Loaded with Tricyclic Lactones for Combined Cancer Therapy
Source: MDPI journal article supplement (doi:10.3390/pharmaceutics13111905), 2021-11-10
Supplement: s1 [file s1]

# Magnetoliposomes Based on Magnetic/Plasmonic Nanoparticles Loaded with Tricyclic Lactones for Combined Cancer Therapy

Irina S. R. Rio <sup>1</sup>, Ana Rita O. Rodrigues <sup>1</sup>, Juliana M. Rodrigues <sup>2</sup>, Maria-João R. P. Queiroz <sup>2</sup>, R. C. Calhelha <sup>3</sup>, Isabel C. F. R. Ferreira <sup>3</sup>, Bernardo G. Almeida <sup>1</sup>, Ana Pires <sup>4</sup>, André M. Pereira <sup>4</sup>, João P. Araújo <sup>4</sup>, Elisabete M. S. Castanheira <sup>1,\*</sup> and Paulo J. G. Coutinho <sup>1,\*</sup>

<sup>1</sup> Centre of Physics of Minho and Porto Universities (CF-UM-UP), University of Minho, Campus de Gualtar, 4710-057 Braga, Portugal; id9261@alunos.uminho.pt (I.S.R.R.); ritarodrigues@fisica.uminho.pt (A.R.O.R.); bernardo@fisica.uminho.pt (B.G.A.)

<sup>2</sup> Centre of Chemistry (CQUM), University of Minho, Campus de Gualtar, 4710-057 Braga, Portugal; juliana.mourarodrigues@gmail.com (J.M.R.); mjrpg@quimica.uminho.pt (M.-J.R.P.Q.)

<sup>3</sup> Mountain Research Centre, Polytechnic Institute of Bragança, Campus de Santa Apolónia, 5300-253 Bragança, Portugal; calhelha@ipb.pt (R.C.C.); iferreira@ipb.pt (I.C.F.R.F.)

<sup>4</sup> IFIMUP—Instituto de Física dos Materiais, Universidade do Porto, R. Campo Alegre, 4169-007 Porto, Portugal; ana.pires@fc.up.pt (A.P.); ampereira@fc.up.pt (A.M.P.); jearaujo@fc.up.pt (J.P.A.)

\* Correspondence: ecoutinho@fisica.uminho.pt (E.M.S.C.); pcoutinho@fisica.uminho.pt (P.J.G.C.); Tel.: +351-253-604-321 (E.M.S.C. & P.J.G.C.)

## Modeling of Nile Red absorption spectra

A set of absorption spectra of the dye Nile Red, at several temperatures, were globally fitted to a sum of eight Gaussian functions and a dispersive background, as follows:

$$g_j(\lambda) = \frac{1}{\sigma_j \sqrt{2\pi}} e^{-\frac{1}{2} \left( \frac{\lambda - \lambda_{max,j}}{\sigma_j} \right)^2} \quad (1)$$

$$Abs(\lambda, T_i) = A_{disp}(\lambda, T_i) + A(T_i) \sum_{j=1}^8 f_j g_j(\lambda) \quad (2)$$

$$A_{disp}(\lambda, T_i) = A_{offset}(T_i) + \frac{A_d(T_i)}{(\lambda/100)^4} \quad (3)$$

$$f_1(T_i) = \sin^2 \left( a_1 + b_1 \times \left( \frac{T_i - T_0}{T_0} \right) + c_1 \times \left( \frac{T_i - T_0}{T_0} \right)^2 \right) \quad (4)$$

$$T_0 = 21 \text{ } ^\circ\text{C}$$

$$f_j(T_i) = \left( 1 - \sum_{k=1}^{j-1} f_k \right) \sin^2 \left( a_j + b_j \times \left( \frac{T_i - T_0}{T_0} \right) + c_j \times \left( \frac{T_i - T_0}{T_0} \right)^2 \right) \quad (5)$$

$$j = 2, 3, \dots, 7$$

$$f_8(T_i) = \left( 1 - \sum_{k=1}^{j-1} f_k \right) \quad (6)$$

In order to control the fitting procedure, the parameters of the Gaussian functions were constrained as follows:

$$\lambda_{max,j} = (\lambda_{max,j})_{min} + [(\lambda_{max,j})_{max} - (\lambda_{max,j})_{min}] \sin^2(m_j) \quad (7)$$

$$\sigma_j = (\sigma_j)_{min} + [(\sigma_j)_{max} - (\sigma_j)_{min}] \sin^2(s_j) \quad (8)$$

**Table S1.** Gaussian functions parameters.

| j                         | 1   | 2   | 3   | 4   | 5   | 6   | 7   | 8   |
|---------------------------|-----|-----|-----|-----|-----|-----|-----|-----|
| $(\lambda_{max,j})_{min}$ | 510 | 520 | 530 | 540 | 550 | 560 | 575 | 590 |
| $(\lambda_{max,j})_{max}$ | 520 | 530 | 540 | 550 | 560 | 575 | 590 | 630 |
| $(\sigma_j)_{min}$        | 5   | 5   | 5   | 5   | 5   | 5   | 5   | 5   |
| $(\sigma_j)_{max}$        | 50  | 10  | 10  | 40  | 10  | 40  | 50  | 50  |

The global fitting procedure for each set of absorption spectra with varying temperature consists on minimizing the following quadratic error sum:

$$ErrorSum = \sum_{i=1}^{n_T} \sum_{l=1}^{n_\lambda} w_l (Abs(\lambda_l, T_i) - Abs_{experimental}(\lambda_l, T_i))^2 \quad (9)$$

where  $w_l$  is a weight at each wavelength of absorption. It was taken as 1, except in the region 520–570 nm, where a value of 50 was used. This procedure ensures a good fit where the spectrum has more features.

The parameters that are varied in order to reach a minimum in the *ErrorSum* are  $A_{offset}$  and  $A_d$  for each absorption spectrum;  $a_1$  to  $a_7$ ;  $b_1$  to  $b_7$ ;  $c_1$  to  $c_7$ ;  $m_1$  to  $m_8$  and  $s_1$  to  $s_8$ .

We used six temperatures, so that each absorption spectrum is fitted with an average of  $2 + (3 \times 7 + 2 \times 8)/6 = 8.17$  parameters. This is equivalent to two parameters for the dispersive background and between 2 and 3 Gaussian functions (5 to 8 parameters).

For the case of the fitting of spectra obtained as a function of irradiation time, the fitted parameters are  $A_{offset}$ ,  $A_d$  and  $T_i$  for each irradiation time.

### Photophysical stability of compound solutions

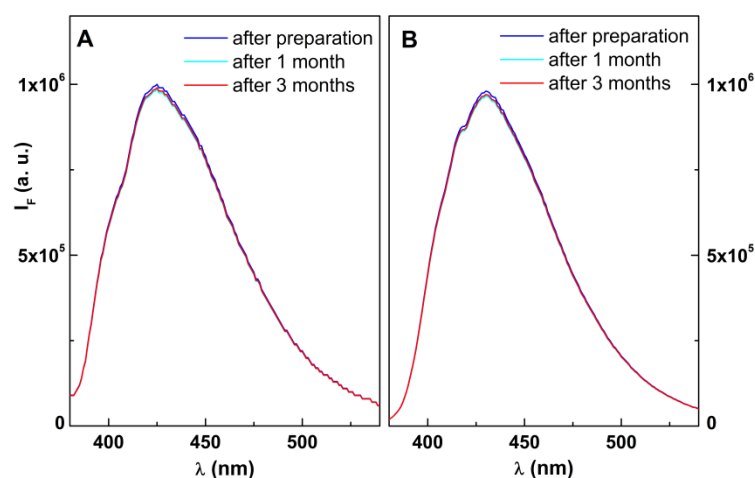

**Figure S1.** Fluorescence emission spectra of compound 1 in chloroform (A) and ethanol (B) (as examples), immediately after solution preparation and after 1 and 3 months of storage.

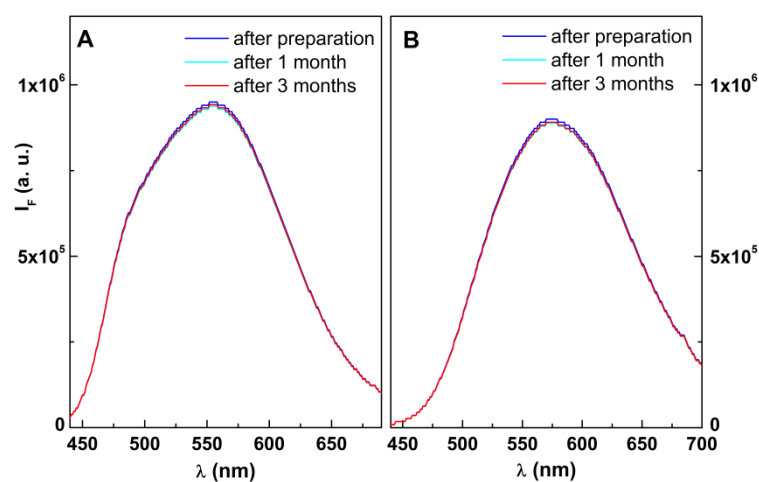

**Figure S2.** Fluorescence emission spectra of compound **2** in ethyl acetate (A) and acetonitrile (B) (as examples), immediately after solution preparation and after 1 and 3 months of storage.

### TEM/STEM images and EDS analysis

#### Transmission electron microscopy (TEM)

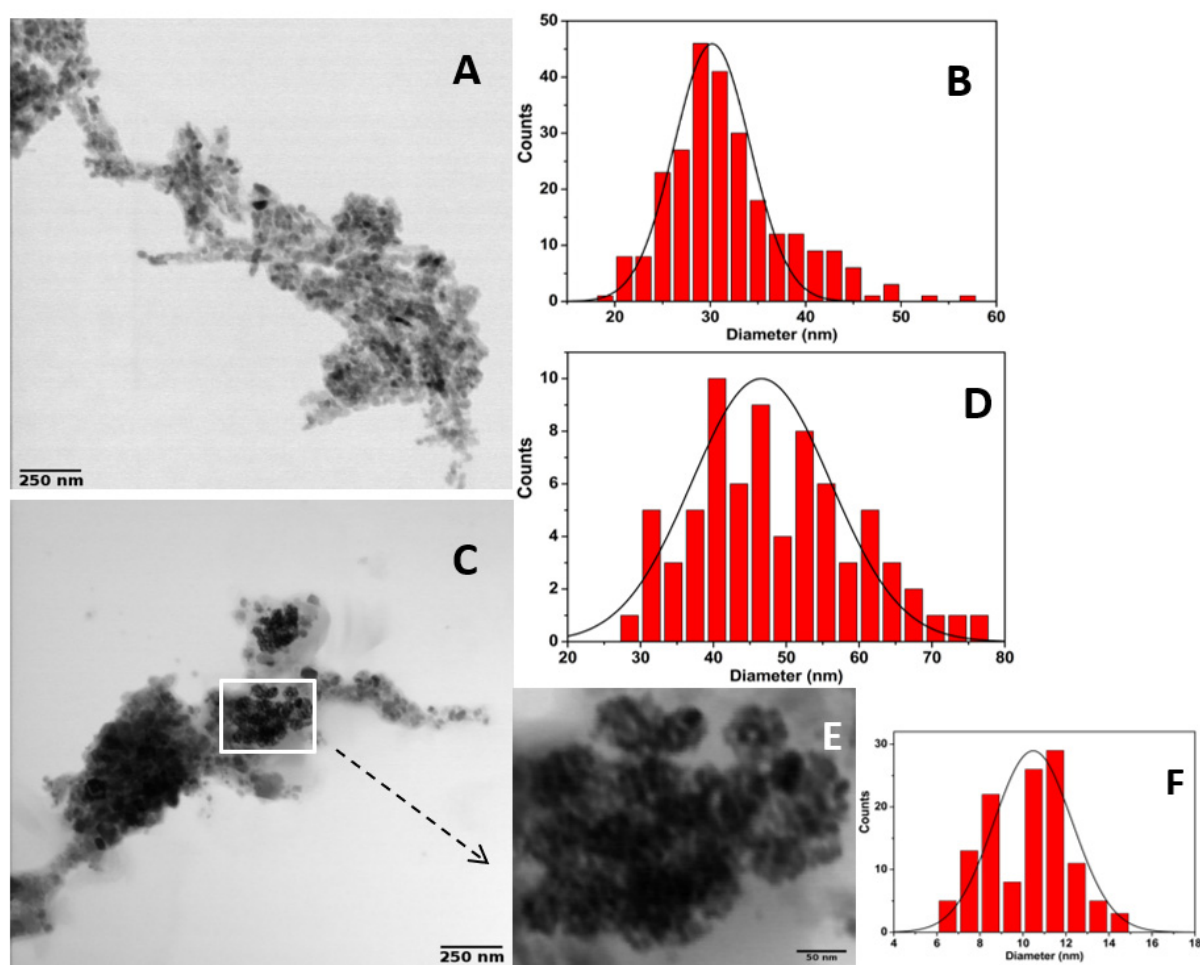

**Figure S3.** (A) Transmission Electron Microscopy image of core/shell nanoparticles and (B) corresponding histogram. (C) Transmission Electron Microscopy image of decorated nanoparticles and (D) corresponding histogram. (E) Expansion of image C (white square) and (F) corresponding histogram.

## Scanning electron microscopy – transmission mode (STEM) and EDS analysis

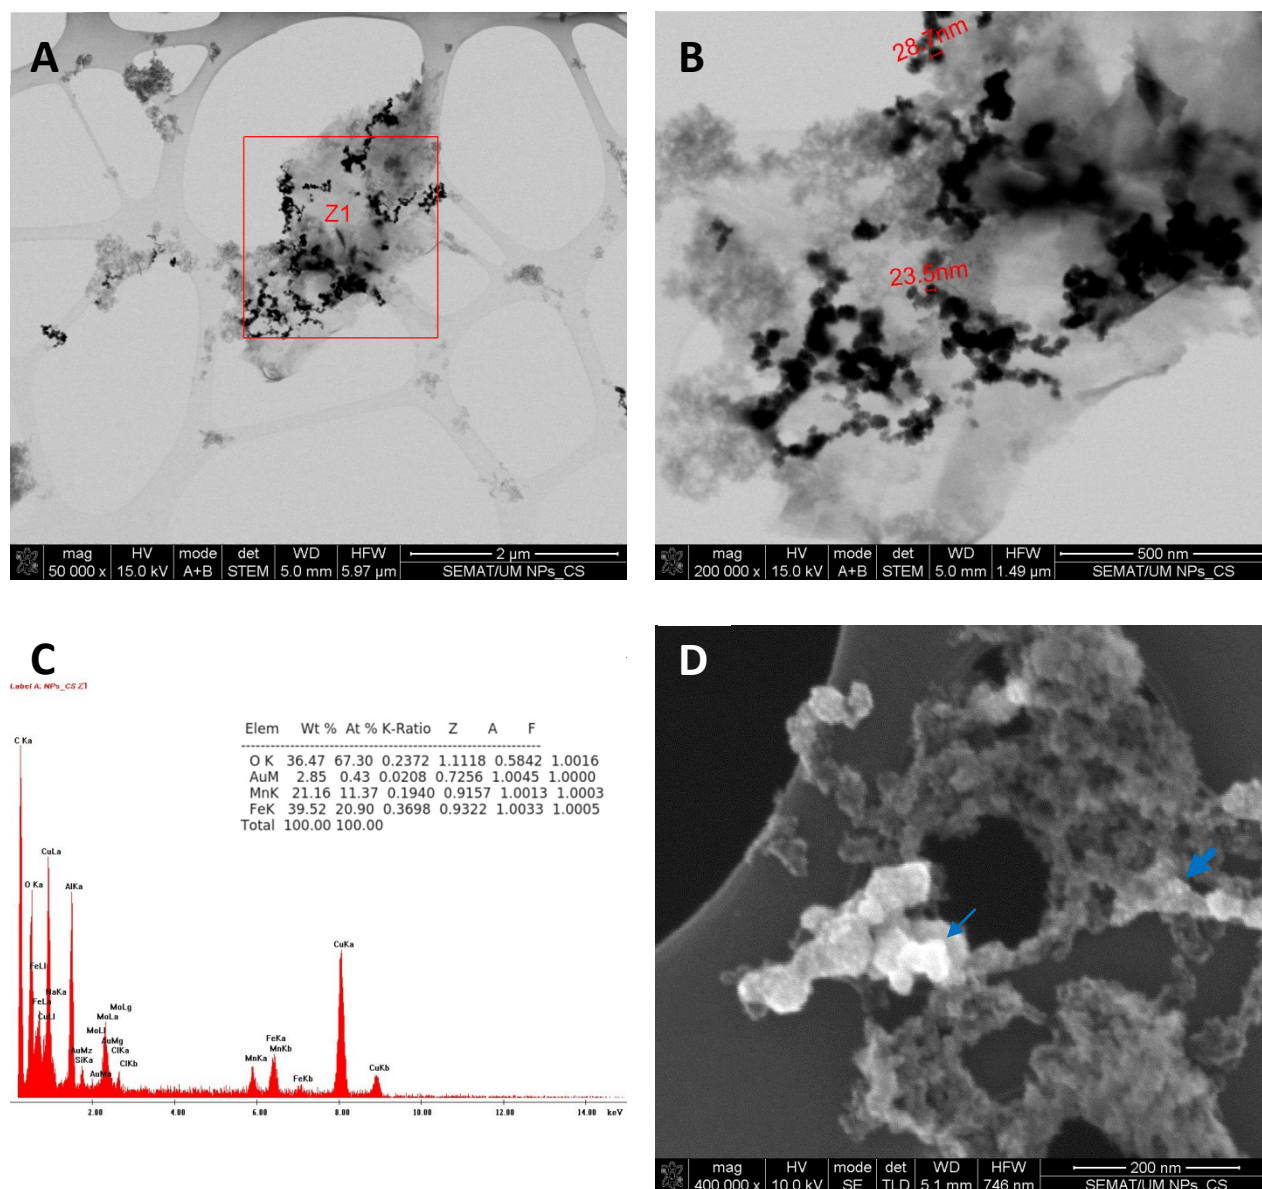

**Figure S4.** (A) and (B) Scanning electron microscopy images in transmission mode (STEM) of core/shell nanoparticles. (C) EDS spectrum of region Z1 (red square) from figure (A). (D) TLD image; particles covered by a gold homogeneous layer are marked with a thin blue arrow; particles with bright gold spots are marked with a thick blue arrow.
